# Supplementary material for: Composition-structure–physical property relationship and nonlinear optical properties of multiferroic hexagonal ErMn1−xCrxO3 nanoparticles
Source: Royal Society of Chemistry journal article supplement (doi:10.1039/c4ra12622j), 2015-01-01
Supplement: c4ra12622j1.pdf [file c4ra12622j1.pdf]

**Table 1** Nonlinear optical properties of  $\text{ErMn}_{1-x}\text{Cr}_x\text{O}_3$  for input laser pulse energy of 90  $\mu\text{J}$  at 532

| Cr concentration | $\beta$<br>( $\times 10^{-11}$ )(m/W) | $I_s$ ( $\times 10^{11}$ )(W/m <sup>2</sup> ) | Optical limiting<br>threshold<br>( $\times 10^{12}$ ) (W/m <sup>2</sup> ) |
|------------------|---------------------------------------|-----------------------------------------------|---------------------------------------------------------------------------|
| x=0.05           | 0.9                                   | 2.9                                           | 1.9                                                                       |
| x=0.05           | 1.3                                   | 2.8                                           | 1.4                                                                       |
| x=0.15           | 1.4                                   | 1.6                                           | 1.3                                                                       |

nm wavelength
